# Supplementary material
Source: MDPI journal article supplement (https://www.mdpi.com/2076-3417/10/6/1963)
Supplement: s1 [file s1]

The Spatial Distribution and Contamination Status of Heavy Metals in Cropland Soils of Twelve Cities in Shandong Province, China

Weina Xue1, 2, Yanbo Peng3, Aixia Jiang1, Taiyu Chen2, Jiemin Cheng1*

1 College of Geography and Environmental Science, Shandong Normal University, Jinan, 250300, China; [qingjeep@163.com](mailto:qingjeep@163.com) (Weina Xue), [jaixia79@sina.com](mailto:jaixia79@sina.com) (Aixia Jiang), [jmcheng2002@hotmail.com](mailto:jmcheng2002@hotmail.com) (Jiemin Cheng);

2 School of Municipal and Environmental Engineering, Shandong Jianzhu University, Jinan, 250101, China; [1091997472@qq.com](mailto:1091997472@qq.com) (Taiyu Chen);

3  Shandong Academy for Environment Planning, Jinan, 250101, China. [pengyanbo@sdaep.com](mailto:pengyanbo@sdaep.com) (Yanbo Peng)

***** Correspondence: jmcheng2002@hotmail.com; Tel.: +86-0531-86181939

**Table S1.** The longitude and latitude of the total sampling sites in Shandong Province.

| **No.** | **Cities** | **X** | **Y** | **No.** | **Cities** | **X** | **Y** |
| --- | --- | --- | --- | --- | --- | --- | --- |
| 1 | Tai'an | 117°16′19.57″ E | 36°13′81.6″ N | 29 | Qingdao | 120°28′07.8″ E | 36°24′57.5″ N |
| 2 | Dezhou | 116°27′86.35″ E | 37°12′32.5″ N | 30 | Qingdao | 120°34'20″ E | 36°28'44″ N |
| 3 | Dezhou | 116°34'29.28" E | 37°18'25.92" N | 31 | Tai'an | 117°33′22″ E | 35°55′11″ N |
| 4 | Dezhou | 116°55′34.08″ E | 37°13′07.9″ N | 32 | Tai'an | 117°49′52″ E | 35°48′36″ N |
| 5 | Heze | 116°11′26.16″ E | 35°23′58.4″ N | 33 | Tai'an | 117°05'25.2″ E | 35°54'22.1″ N |
| 6 | Heze | 115°49′31.8″ E | 36°32′04.1″ N | 34 | Tai'an | 117°04′40.1″ E | 35°51′30.3″ N |
| 7 | Jinan | 117°04′43.38″ E | 37°15′51.0″ N | 35 | Weifang | 118°21′21″ E | 36°25′32.6″ N |
| 8 | Jinan | 117°09′55.8″ E | 37°14′29.8″ N | 36 | Weifang | 118°18′50.3″ E | 36°36′51.4″ N |
| 9 | Jinan | 117°05′58.92″ E | 36°49′29.1″ N | 37 | Weifang | 118°54′12.7″ E | 36°54′57.4″ N |
| 10 | Liaocheng | 115°50′31.62″ E | 36°01′15.7″ N | 38 | Weihai | 121°58′36.2″ E | 37°24′34.2″ N |
| 11 | Liaocheng | 116°06′10.21″ E | 36°35′56.02″ N | 39 | Weihai | 121°52'53.9″ E | 37°05'00.4″ N |
| 12 | Liaocheng | 116°10'17.04″ E | 36°47’25.4″ N | 40 | Weihai | 121°41′07.1″ E | 36°54′58.7″ N |
| 13 | Liaocheng | 116°10'1.05″ E | 36°17'54″ N | 41 | Yantai | 120°48'44.2″ E | 36°59'12.6″ N |
| 14 | Liaocheng | 117°15'60″ E | 36° N | 42 | Yantai | 120°21′33.8″ E | 37°26′50.7″ N |
| 15 | Linyi | 118°35′24.3″ E | 35°42′18.6″ N | 43 | Yantai | 120°30'7.7″ E | 37°22'57.7″ N |
| 16 | Linyi | 117°56′07.8″ E | 35°35′19.92″ N | 44 | Yantai | 121°41'54.4" E | 37°24'23.4" N |
| 17 | Linyi | 117°54′9" E | 35°43′47″ N | 45 | Yantai | 120°7'48.9" E | 36°38'42.8" N |
| 18 | Linyi | 117°37′5.1″ E | 35°28′44.6″ N | 46 | Yantai | 120°43′46″ E | 36°38′47″ N |
| 19 | Linyi | 117°37'5.1″ E | 35°28'44.6″ N | 47 | Zaozhuang | 117°32′44.9″ E | 35°04′34.7″ N |
| 20 | Linyi | 118°10′22.8″ E | 34°52′0.4″ N | 48 | Zaozhuang | 117°15′58.2″ E | 35°05′41.0″ N |
| 21 | Linyi | 118°8′37.1″ E | 34°58′9.9″ N | 49 | Zaozhuang | 117°15'53.5" E | 35°05'48.4" N |
| 22 | Linyi | 118°45′56.4″ E | 35°18′60″ N | 50 | Zaozhuang | 117°4'55.8" E | 35°5'13.4" N |
| 23 | Linyi | 118°41′57″ E | 35°35′4.2″ N | 51 | Zaozhuang | 117°16'0.7" E | 35°5'41.34" N |
| 24 | Qingdao | 119°44'38.15″ E | 36°46'33.4″ N | 52 | Zibo | 118°3'50.4" E | 36°11'31.2" N |
| 25 | Qingdao | 120°22′16.3″ E | 36°47′33.8″ N | 53 | Zibo | 118°18'50" E | 36°09'30" N |
| 26 | Qingdao | 120°25'48.98" E | 36°49'44.7" N | 54 | Zibo | 118°18'36″ E | 36°1' N |
| 27 | Qingdao | 120°33'50.12" E | 36°55'48.2" N | 55 | Zibo | 118°18' E | 36°01' N |
| 28 | Qingdao | 120°57' E | 36°48' N |  |  |  |  |

**Table S2.** Thewebsites of cities’ yearbooks in statistical bureau.

| **Cities** | **Websites of cities’ yearbooks in statistical bureau** |
| --- | --- |
| Qingdao | http://qdsqs.qingdao.gov.cn/n15752132/n20546841/index.html |
| Yantai | http://tjj.yantai.gov.cn/art/2019/1/30/art_118_2363456.html |
| Jinan | http://jntj.jinan.gov.cn/art/2018/12/27/art_27523_2770523.html |
| Weifang | http://tjj.weifang.gov.cn/tjyw/tjsj/ndsj/201901/t20190115_5269605.htm |
| Zibo | http://tj.zibo.gov.cn/art/2018/12/7/art_886_1561473.html |
| Linyi | http://tjj.linyi.gov.cn/info/1061/6727.htm |
| Tai’an | http://tjj.taian.gov.cn/art/2019/1/14/art_46886_4783229.html |
| Weihai | http://tjj.weihai.gov.cn/art/2019/4/2/art_13261_1605593.html |
| Dezhou | http://dztj.dezhou.gov.cn/n3100530/n38260319/c47162393/content.html |
| Liaocheng | http://www.liaocheng.gov.cn/xxgk/szfbmxxgk/stjj/201908/t20190816_2351533.html |
| Heze | http://hztj.heze.gov.cn/art/2019/2/13/art_17606_4598969.html |
| Zaozhuang | http://stjj.zaozhuang.gov.cn/tjsj/tjnj/201910/t20191010_373102.html |

**Table S3.** The retrieved economic indicators from cities’ yearbooks during 2017 (billion).

| **Cities** | **Gross product** | **The primary industrial added value** | **The secondary industrial added value** | **The industrial added value** | **The tertiary industrial added value** |
| --- | --- | --- | --- | --- | --- |
| Dezhou | 28.43 | 3.554 | 13.675 | —— | 11.201 |
| Dezhou | 26.12 | 3.283 | 11.788 | —— | 11.049 |
| Dezhou | 22.17 | 2.92 | 10.471 | —— | 8.779 |
| Heze | 29.811 | 2.956 | 15.759 | —— | 11.097 |
| Heze | 36.427 | 3.824 | 19.294 | —— | 13.309 |
| Jinan | 20.39 | 4.89 | 8.08 | 6.81 | 7.42 |
| Jinan | 33.6 | 5.33 | 17.26 | 15.32 | 11.01 |
| Jinan | 20.39 | 4.89 | 8.08 | 6.81 | 7.42 |
| Liaocheng | 49.78 | 5.367 | 31.162 | 30.217 | 13.309 |
| Liaocheng | 41.521 | 3.995 | 26.493 | 25.723 | 11.034 |
| Liaocheng | 41.521 | 3.995 | 26.493 | 25.723 | 11.034 |
| Liaocheng | 34.369 | 4.822 | 18.288 | 17.256 | 11.259 |
| Liaocheng | 34.369 | 4.822 | 18.288 | 17.256 | 11.259 |
| Linyi | 38.191 | 6.071 | 13.45 | —— | 18.67 |
| Linyi | 38.191 | 6.071 | 13.45 | —— | 18.67 |
| Linyi | 31.043 | 3.792 | 12.811 | —— | 14.44 |
| Linyi | 31.043 | 3.792 | 12.811 | —— | 14.44 |
| Linyi | 19.35 | 3.06 | 6.941 | —— | 9.349 |
| Linyi | 19.35 | 3.06 | 6.941 | —— | 9.349 |
| Linyi | 40.039 | 3.765 | 17.095 | —— | 19.179 |
| Linyi | 26.269 | 3.807 | 10.316 | —— | 12.146 |
| Qingdao | 131.061 | 6.432 | 71.176 | —— | 53.453 |
| Qingdao | 131.061 | 6.432 | 71.176 | —— | 53.453 |
| Qingdao | 131.061 | 6.432 | 71.176 | —— | 53.453 |
| Qingdao | 59.572 | 6.628 | 28.803 | —— | 24.141 |
| Qingdao | 59.572 | 6.628 | 28.803 | —— | 24.141 |
| Qingdao | 87.519 | 10.961 | 44.741 | —— | 31.817 |
| Qingdao | 87.519 | 10.961 | 44.741 | —— | 31.817 |
| Tai'an | 44.489 | 5.643 | 19.239 | 17.345 | 19.607 |
| Tai'an | 44.489 | 5.643 | 19.239 | 17.345 | 19.607 |
| Tai'an | 54.385 | 0.731 | 18.37 | 14.631 | 35.284 |
| Tai'an | 84.265 | 5.9 | 40.494 | 37.695 | 37.87 |
| Tai'an | 84.265 | 5.9 | 40.494 | 37.695 | 37.87 |
| Weihai | 36.954 | 2.889 | 14.119 | —— | 19.947 |
| Weihai | 54.811 | 4.458 | 25.502 | —— | 24.851 |
| Weihai | 83.39 | 6.692 | 38.112 | —— | 38.586 |
| Weifang | 28.02 | 3.74 | 11.07 | 9.68 | 13.21 |
| Weifang | 65.84 | 5.52 | 29.07 | 25.08 | 31.26 |
| Weifang | 86.67 | 10.21 | 34.53 | 28.86 | 41.84 |
| Yantai | 37.808 | 4.912 | 17.599 | —— | 15.296 |
| Yantai | 37.808 | 4.912 | 17.599 | —— | 15.296 |
| Yantai | 37.808 | 4.912 | 17.599 | —— | 15.296 |
| Yantai | 34.406 | 4.236 | 16.054 | —— | 14.116 |
| Yantai | 74.006 | 4.43 | 3.764 | —— | 3.194 |
| Yantai | 74.006 | 4.43 | 3.764 | —— | 3.194 |
| Zaozhuang | 14.021 | 1.718 | 6.585 | 6.226 | 5.718 |
| Zaozhuang | 114.655 | 7.151 | 57.856 | 50.392 | 49.648 |
| Zaozhuang | 114.655 | 7.151 | 57.856 | 50.392 | 49.648 |
| Zaozhuang | 114.655 | 7.151 | 57.856 | 50.392 | 49.648 |
| Zaozhuang | 114.655 | 7.151 | 57.856 | 50.392 | 49.648 |
| Zibo | 29.522 | 3.272 | 12.66 | —— | 13.59 |
| Zibo | 29.522 | 3.272 | 12.66 | —— | 13.59 |
| Zibo | 29.522 | 3.272 | 12.66 | —— | 13.59 |
| Zibo | 29.522 | 3.272 | 12.66 | —— | 13.59 |
